# Supplementary material for: Associations between Community Environmental-Level Factors and Diet Quality in Geographically Isolated Australian Communities
Source: PubMed Central journal article supplement (PMC6603945; doi:10.3390/ijerph16111943), 2019-05-31
Supplement: ijerph-16-01943-s001.pdf [file ijerph-16-01943-s001.pdf]

## Supplement 1:

Regression model outputs for discretionary sales as a percentage of total energy, sugar-sweetened beverage sales as a percentage of total energy, fruit and vegetable sales as a percentage of total quantity and total food and beverage sales as a percentage of estimated average requirement for energy.

**Table S1:** Discretionary sales as a percentage of total energy

| Source   | SS         | df | MS         | Number of obs | = | 9       |
|----------|------------|----|------------|---------------|---|---------|
| Model    | 46.0097129 | 6  | 7.66828548 | F(6, 2)       | = | 0.45    |
| Residual | 34.21782   | 2  | 17.10891   | Prob > F      | = | 0.8114  |
|          |            |    |            | R-squared     | = | 0.5735  |
|          |            |    |            | Adj R-squared | = | -0.7060 |
| Total    | 80.2275329 | 8  | 10.0284416 | Root MSE      | = | 4.1363  |

  

| PercentEnergyDiscretionary        | Coef.     | Std. Err. | t     | P> t  | Beta      |
|-----------------------------------|-----------|-----------|-------|-------|-----------|
| Neighbouring_Store_Distance_km    | -.0116275 | .0403251  | -0.29 | 0.800 | -.1910715 |
| Food_Delivery_Freq<br>fortnightly | 2.712725  | 3.112771  | 0.87  | 0.475 | .4514792  |
| Perc_Indg_UnEmp                   | -.187929  | .4419009  | -0.43 | 0.712 | -.3971012 |
| Med_Indig_hh_inc_wk               | -.001466  | .0051914  | -0.28 | 0.804 | -.1507142 |
| Perc_dwg_need_extra_bedrm_Indig0  | .186329   | .2808164  | 0.66  | 0.575 | .6186806  |
| Perc_Y9_equiv_Indig               | -.0640884 | .1415724  | -0.45 | 0.695 | -.461741  |
| _cons                             | 35.82796  | 10.54745  | 3.40  | 0.077 | .         |

Neighbouring\_Store\_Distance\_km - Distance to a neighbouring store (km); Food\_Delivery\_Freq - Frequency of food delivery (fortnightly vs weekly); Perc\_Indg\_UnEmp - Percent Indigenous Australian Unemployment (%); Med\_Indig\_hh\_inc\_wk - Median Indigenous Australian household income (\$/week); Perc\_dwg\_need\_extra\_bedroom\_Indig0 - Percent of Indigenous Australian dwellings needing extra bedroom/s (%); Perc\_Y9\_equiv\_Indig - Percent Indigenous Australians educated to school year 9+ (%).

**Table S2:** Sugar-sweetened beverage sales as a percentage of total energy

| Source   | SS         | df | MS         | Number of obs | = | 9       |
|----------|------------|----|------------|---------------|---|---------|
| Model    | 5.41700787 | 6  | .902834644 | F(6, 2)       | = | 0.71    |
| Residual | 2.55438337 | 2  | 1.27719168 | Prob > F      | = | 0.6862  |
|          |            |    |            | R-squared     | = | 0.6796  |
|          |            |    |            | Adj R-squared | = | -0.2818 |
| Total    | 7.97139124 | 8  | .996423904 | Root MSE      | = | 1.1301  |

| PercentEnergySSB                  | Coef.     | Std. Err. | t     | P> t  | Beta      |
|-----------------------------------|-----------|-----------|-------|-------|-----------|
| Neighbouring_Store_Distance_km    | -.0126668 | .0110177  | -1.15 | 0.369 | -.6603425 |
| Food_Delivery_Freq<br>fortnightly | .7399893  | .8504798  | 0.87  | 0.476 | .3907078  |
| Perc_Indg_UnEmp                   | .0175559  | .1207374  | 0.15  | 0.898 | .1176858  |
| Med_Indig_hh_inc_wk               | .0001747  | .0014184  | 0.12  | 0.913 | .0569831  |
| Perc_dwg_need_extra_bedrm_Indig0  | -.0967381 | .0767254  | -1.26 | 0.335 | -1.01901  |
| Perc_Y9_equiv_Indig               | .0154018  | .0386808  | 0.40  | 0.729 | .3520347  |
| _cons                             | 12.80875  | 2.881804  | 4.44  | 0.047 | .         |

Neighbouring\_Store\_Distance\_km - Distance to a neighbouring store (km); Food\_Delivery\_Freq - Frequency of food delivery (fortnightly vs weekly); Perc\_Indg\_UnEmp - Percent Indigenous Australian Unemployment (%); Med\_Indig\_hh\_inc\_wk - Median Indigenous Australian household income (\$/week); Perc\_dwg\_need\_extra\_bedroom\_Indig0 - Percent of Indigenous Australian dwellings needing extra bedroom/s (%); Perc\_Y9\_equiv\_Indig - Percent Indigenous Australians educated to school year 9+ (%).

**Table S3:** Fruit and vegetable sales as a percentage of total quantity

| Source   | SS         | df | MS         | Number of obs | = | 9       |
|----------|------------|----|------------|---------------|---|---------|
| Model    | 18.0898849 | 6  | 3.01498081 | F(6, 2)       | = | 0.30    |
| Residual | 19.8496804 | 2  | 9.92484022 | Prob > F      | = | 0.8916  |
|          |            |    |            | R-squared     | = | 0.4768  |
|          |            |    |            | Adj R-squared | = | -1.0928 |
| Total    | 37.9395653 | 8  | 4.74244566 | Root MSE      | = | 3.1504  |

  

| PercentQuantityFandV              | Coef.     | Std. Err. | t     | P> t  | Beta      |
|-----------------------------------|-----------|-----------|-------|-------|-----------|
| Neighbouring_Store_Distance_km    | .0176995  | .0307132  | 0.58  | 0.623 | .4229463  |
| Food_Delivery_Freq<br>fortnightly | -2.551127 | 2.370815  | -1.08 | 0.394 | -.6174186 |
| Perc_Indg_UnEmp                   | -.0485716 | .3365701  | -0.14 | 0.898 | -.1492468 |
| Med_Indig_hh_inc_wk               | -.0017354 | .003954   | -0.44 | 0.704 | -.2594333 |
| Perc_dwg_need_extra_bedrm_Indig0  | .0551817  | .2138814  | 0.26  | 0.821 | .2664385  |
| Perc_Y9_equiv_Indig               | -.0048342 | .1078274  | -0.04 | 0.968 | -.050648  |
| _cons                             | 9.310523  | 8.033379  | 1.16  | 0.366 | .         |

Neighbouring\_Store\_Distance\_km - Distance to a neighbouring store (km); Food\_Delivery\_Freq - Frequency of food delivery (fortnightly vs weekly); Perc\_Indg\_UnEmp - Percent Indigenous Australian Unemployment (%); Med\_Indig\_hh\_inc\_wk - Median Indigenous Australian household income (\$/week); Perc\_dwg\_need\_extra\_bedroom\_Indig0 - Percent of Indigenous Australian dwellings needing extra bedroom/s (%); Perc\_Y9\_equiv\_Indig - Percent Indigenous Australians educated to school year 9+ (%).

**Table S4:** Total food and beverage sales as a percentage of estimated average requirement for energy

| Source   | SS         | df | MS         | Number of obs | = | 9      |
|----------|------------|----|------------|---------------|---|--------|
| Model    | 1498.8755  | 6  | 249.812584 | F(6, 2)       | = | 101.46 |
| Residual | 4.92432466 | 2  | 2.46216233 | Prob > F      | = | 0.0098 |
|          |            |    |            | R-squared     | = | 0.9967 |
|          |            |    |            | Adj R-squared | = | 0.9869 |
| Total    | 1503.79983 | 8  | 187.974978 | Root MSE      | = | 1.5691 |

  

| PercentEAREnergy                  | Coef.     | Std. Err. | t      | P> t  | Beta      |
|-----------------------------------|-----------|-----------|--------|-------|-----------|
| Neighbouring_Store_Distance_km    | .2489894  | .0152976  | 16.28  | 0.004 | .9450508  |
| Food_Delivery_Freq<br>fortnightly | -14.76964 | 1.180849  | -12.51 | 0.006 | -.5677652 |
| Perc_Indg_UnEmp                   | -.781228  | .1676378  | -4.66  | 0.043 | -.381287  |
| Med_Indig_hh_inc_wk               | -.0034004 | .0019694  | -1.73  | 0.226 | -.0807456 |
| Perc_dwg_need_extra_bedrm_Indig0  | .1084658  | .1065295  | 1.02   | 0.416 | .0831851  |
| Perc_Y9_equiv_Indig               | -.2212408 | .0537064  | -4.12  | 0.054 | -.3681719 |
| _cons                             | 100.4647  | 4.001242  | 25.11  | 0.002 | .         |

Neighbouring\_Store\_Distance\_km - Distance to a neighbouring store (km); Food\_Delivery\_Freq - Frequency of food delivery (fortnightly vs weekly); Perc\_Indg\_UnEmp - Percent Indigenous Australian Unemployment (%); Med\_Indig\_hh\_inc\_wk - Median Indigenous Australian household income (\$/week); Perc\_dwg\_need\_extra\_bedroom\_Indig0 - Percent of Indigenous Australian dwellings needing extra bedroom/s (%); Perc\_Y9\_equiv\_Indig - Percent Indigenous Australians educated to school year 9+ (%).

## Supplement 2:

Associations between dietary intake features associated with cardio-metabolic disease risk and distance to the neighbouring store and frequency of food delivery for only the 13 common communities in both the Stores Healthy Options Project in Remote Indigenous Communities (SHOP@RIC) study and the Environments & Remote Indigenous Cardio-metabolic Health Project (EnRICH).

|                                      | n  | Discretionary Foods<br>(% Energy) | Sugar Sweetened Beverages<br>(% Energy) | Fruit & Vegetable<br>(% Quantity) | Percent Estimated<br>Average Requirement<br>for Energy |
|--------------------------------------|----|-----------------------------------|-----------------------------------------|-----------------------------------|--------------------------------------------------------|
| Distance to neighbouring store (km)  |    |                                   |                                         |                                   |                                                        |
| <124                                 | 6  | 41.0±3.6                          | 7.9±1.0                                 | 10.4±2.7                          | 97.5±16.0                                              |
| ≥124                                 | 7  | 40.3±2.4                          | 6.9±1.2                                 | 9.2±1.1                           | 109.4±7.3                                              |
| P-value <sup>1</sup>                 |    | 0.67                              | 0.10                                    | 0.32                              | 0.10                                                   |
| Correlation coefficient <sup>2</sup> | 9  | r=-0.37, p=0.33                   | r=-0.16, p=0.68                         | r=0.28, p=0.47                    | r=0.80, p=0.01                                         |
| Frequency of food delivery           |    |                                   |                                         |                                   |                                                        |
| Weekly                               | 7  | 39.5±2.6                          | 7.0±1.3                                 | 10.4±1.5                          | 107.1±8.6                                              |
| Fortnightly                          | 6  | 41.9±2.8                          | 7.8±0.9                                 | 9.0±2.4                           | 100.1±17.1                                             |
| P-value <sup>1</sup>                 |    | 0.12                              | 0.21                                    | 0.21                              | 0.36                                                   |
| Correlation coefficient <sup>2</sup> | 13 | r=0.45, p=0.12                    | r=-0.37, p=0.21                         | r=-0.38, p=0.21                   | r=-0.28, p=0.36                                        |

Data are means ± SD

<sup>1</sup>Differences between groups (independent t-test)

<sup>2</sup>Correlation between variables (Pearson correlation)

### Supplement 3:

Differences between common communities in the Stores Healthy Options Project in Remote Indigenous Communities (SHOP@RIC) study and the Environments & Remote Indigenous Cardio-metabolic Health Project (EnRICH) and the non-common SHOP@RIC communities.

|                                                | n  | Discretionary Foods (% Energy) | Sugar Sweetened Beverages (% Energy) | Fruit & Vegetable (% Quantity) | Percent Estimated Average Requirement for Energy |
|------------------------------------------------|----|--------------------------------|--------------------------------------|--------------------------------|--------------------------------------------------|
| Total (SHOP@RIC and EnRICH common communities) | 13 | 40.6±2.9                       | 7.4±1.2                              | 9.7±2.0                        | 103.9±13.1                                       |
| Total (SHOP@RIC non-common communities)        | 7  | 42.4±1.1                       | 9.5±1.5                              | 8.5±1.9                        | 76.5±11.4                                        |
| Total (All SHOP@RIC communities)               | 20 | 41.2±2.5                       | 8.1±1.7                              | 9.3±2.0                        | 94.3±18.2                                        |
| P-value <sup>1</sup>                           |    | 0.14                           | <0.01                                | 0.19                           | <0.001                                           |

Data are means ± SD

<sup>1</sup>Differences between SHOP@RIC and EnRICH common communities and residual SHOP@RIC (non-common) communities (independent t-test).
